# Supplementary material for: Identifying and Managing Aqueous Film‐Forming Foam‐Derived Per‐ and Polyfluoroalkyl Substances in the Environment
Source: PubMed Central journal article supplement — Environ Toxicol Chem. 2020 Dec 9;40(1):24–36. doi: 10.1002/etc.4894 (PMC7839684; doi:10.1002/etc.4894), 2020-12-09
Supplement: ETC-40-24-s001.pdf [file ETC-40-24-s001.pdf]

**Supplemental Table 1. Completed and On-Going AFFF-Derived PFAS Projects with SERDP&ESTCP through May 2020**

| Principal Investigator                               | Institution                          | Project Title                                                                                                                                                                       |
|------------------------------------------------------|--------------------------------------|-------------------------------------------------------------------------------------------------------------------------------------------------------------------------------------|
| <b>Analytical and Environmental Sampling Methods</b> |                                      |                                                                                                                                                                                     |
| <a href="#">Lee Slater</a>                           | Rutgers Univ.                        | Bench-Scale Assessment of NMR and CRS Technologies for Rapid Assessment of PFAS in Soils and Sediments                                                                              |
| <a href="#">Graham Peaslee</a>                       | Univ. Notre Dame                     | Developing PIGE into a Rapid Field-Screening Test for PFAS                                                                                                                          |
| <a href="#">Jinxia Liu</a>                           | McGill Univ.                         | Development and Validation of Analytical Methods for Comprehensive Profiling of PFAS in AFFF In Environmental Media                                                                 |
| <a href="#">Jennifer Field</a>                       | Oregon State Univ.                   | Assessing and Mitigating Bias in PFAS Levels during Ground and Surface Water Sampling                                                                                               |
| <a href="#">David Hanigan</a>                        | Univ. Nevada, Reno                   | Rapid Site Profiling of Organofluorine: Quantification of PFAS by Combustion Gas Analysis                                                                                           |
| <a href="#">Joseph Quinnan</a>                       | Arcadis-US Inc                       | Validation of Streamlined Mobile Lab-Based Real Time PFAS Analytical Methods                                                                                                        |
| <a href="#">Lee Blaney</a>                           | Univ. of Maryland Baltimore County   | Ion exchange membranes and fibers as passive samplers for chemically-diverse PFAS                                                                                                   |
| <a href="#">Yin Wang</a>                             | Univ. of Wisconsin                   | Development of a Novel PFAS Passive Sampler with Efficient Sorbent Media and Robust Membrane Barrier                                                                                |
| <a href="#">Craig Divine</a>                         | Arcadis-US Inc                       | Osorb® Media Use in Per- and Polyfluoroalkyl Substances (PFAS) Passive Samplers                                                                                                     |
| <a href="#">Sarit Kaserzon</a>                       | Univ. of Queensland                  | Development of passive sampling methodologies for per- and polyfluoroalkyl substances                                                                                               |
| <a href="#">Mei Sun</a>                              | Univ. of North Carolina at Charlotte | Passive samplers for per- and polyfluoroalkyl substances with innovative sorbents                                                                                                   |
| <a href="#">Rainer Lohmann</a>                       | Univ. of Rhode Island                | Development and field-testing of advanced passive samplers for PFASs                                                                                                                |
| <a href="#">Upal Ghosh</a>                           | Univ. of Maryland Baltimore County   | Development of novel functionalized polymeric thin films for equilibrium passive sampling of PFAS compounds in surface and groundwater                                              |
| <a href="#">Julian Fairey</a>                        | Univ. of Arkansas                    | Development of a Diffusive Gradients in Thin-Films Passive Sampling Methodology for Per- and Polyfluoroalkyl Substances in Water                                                    |
| <a href="#">Benjamin Place</a>                       | NIST                                 | Improving Access and Utility of Analytical Data for the Confident Discovery, Identification, and Source-Attribution of PFAS in Environmental Matrices                               |
| <a href="#">Mark Benotti</a>                         | NewFields Government Services        | Establishing an Approach to PFAS Forensics and a PFAS Source Materials Forensic Library                                                                                             |
| <a href="#">Tohren Kibbey</a>                        | Univ. of Oklahoma                    | Machine Learning Pattern Recognition for Forensic Analysis of Detected Per- and Polyfluoroalkyl Substances in Environmental Samples                                                 |
| <a href="#">Jens Blotevogel</a>                      | Colorado State Univ.                 | Ultrahigh-Resolution Fourier-Transform Ion Cyclotron Resonance Mass Spectrometry for Fingerprinting, Source Tracking, and Allocation of Per- and Polyfluoroalkyl Substances (PFASs) |
| <a href="#">David Sedlak</a>                         | Univ. of California, Berkeley        | A Simple and Robust Forensic Technique for Differentiating PFAS Associated with AFFF from other PFAS Sources                                                                        |
| <a href="#">Chris Higgins</a>                        | Colorado School of Mines             | Comprehensive Forensic Approach for Source Allocation of Poly- and Perfluoroalkyl Substances                                                                                        |
| <a href="#">Craig Divine</a>                         | Arcadis-US Inc                       | Vertebrae™ Segmented Horizontal Wells for Monitoring Contaminant Mass Discharge                                                                                                     |
| <b>Ecotoxicity and Ecological Risk Assessment</b>    |                                      |                                                                                                                                                                                     |
| <a href="#">Matt Simcik</a>                          | Univ. Minnesota                      | Development of TRVs for Birds Exposed to PFOS, PFOA and Associated Mixtures of Fluorinated Compounds                                                                                |
| <a href="#">Marisol Sepulveda</a>                    | Purdue Univ.                         | Development of Amphibian PFAS TRVs for use in Ecological Risk Assessment at AFFF Sites                                                                                              |
| <a href="#">Michael Quinn</a>                        | U.S. Army Public Health              | Development of Toxicity Data to Support Toxicity Reference Values for Perfluorinated Compounds                                                                                      |
| <a href="#">Chris Salice</a>                         | Towson Univ.                         | Advancing the Understanding of the Ecological Risk of PFAS                                                                                                                          |
| <a href="#">Frank Gobas</a>                          | Simon Fraser Univ.                   | A Framework for Assessing Bioaccumulation and Exposure Risks of PFAS in T&E Species on AFFF-Impacted Sites                                                                          |
| <a href="#">Jason Conder</a>                         | Geosyntec Consultants                | Guidance for Assessing the Ecological Risks of PFAS to T&E Species at AFFF-Impacted Sites                                                                                           |
| <a href="#">Jamie Suski</a>                          | EA Engineering                       | Investigating Potential Risk to T&E Species from PFAS on DoD Sites                                                                                                                  |
| <a href="#">Craig Divine</a>                         | Arcadis-US Inc                       | Approach for Assessing PFAS Risk to T&E Species                                                                                                                                     |
| <a href="#">Marie Kurz</a>                           | Drexel University                    | Uptake and Bioaccumulation/Biomagnification of Subsurface-Derived PFAS by Lotic, Warm Water Food Webs                                                                               |
| <a href="#">Roman Kuperman</a>                       | USACCDC - Chem Bio Cntr              | Determination of Biomagnification Potentials for PFAS in Terrestrial Food-webs                                                                                                      |
| <a href="#">Chris Salice</a>                         | Towson Univ.                         | Physiological, Ecological and Environmental Determinants of PFAS Accumulation in Fish: Towards an Improved Bioaccumulation Model                                                    |
| <a href="#">Matt Simcik</a>                          | Univ. Minnesota                      | Developing a Predictive Understanding of PFAS Bioaccumulation with Environmental Complexity                                                                                         |
| <a href="#">Xiaoqin Wu</a>                           | Lawrence Berkeley National Lab       | Comparative Assessment of Toxicity and Bioaccumulation of PFAS-Free Formulations in Terrestrial Plants and Model Soil Invertebrates                                                 |
| <a href="#">Roman Kuperman</a>                       | USACCDC - Chem Bio Cntr              | Soil Ecotoxicity of PFAS-Free Surfactant Formulations                                                                                                                               |
| <a href="#">Michael Quinn</a>                        | U.S. Army Public Health              | Assessing the Ecotoxicity of PFAS-Free Surfactant Formulations in Wild Mice and Japanese Quail                                                                                      |
| <a href="#">Ed Wirth</a>                             | NOAA                                 | Ecotoxicity of PFAS-Free Fire Fighting Foams                                                                                                                                        |
| <a href="#">Jamie Suski</a>                          | EA Engineering                       | Multi-taxa ecotoxicity of Novel PFAS Free Foam versus New Generation Short Chain PFAS Aqueous Film Forming Foam Products                                                            |
| <a href="#">Jason Hoverman</a>                       | Purdue Univ.                         | The relative toxicities of current use aqueous film forming foams and next generation alternatives to aquatic species for informing risk assessment                                 |
| <b>Fate, Transport and Characterization</b>          |                                      |                                                                                                                                                                                     |
| <a href="#">John Kornuc</a>                          | US NAVFEC                            | Characterization of the Nature and Extent of PFAS in Environmental Media at DoD Sites for Informed Decision-Making                                                                  |
| <a href="#">Linda Abriola</a>                        | Tufts                                | Development and Laboratory Validation of Mathematical Modeling Tools to Predict PFAS Fate and Transport at AFFF Source Areas                                                        |
| <a href="#">Charles Schaefer</a>                     | CDM Smith                            | Insights into the Long-Term Mass Discharge & Transformation of AFFF in the Unsaturated Zone                                                                                         |
| <a href="#">Jennifer Field</a>                       | Oregon State Univ.                   | A Mechanistic Understanding of PFAS in Source Zones: Characterization and Control                                                                                                   |
| <a href="#">Elsie Sunderland</a>                     | Harvard Univ.                        | Evaluating the Importance of Precursor Transport and Transformation for Groundwater Contamination with PFAS                                                                         |
| <a href="#">Jeff Silva</a>                           | GSI North America Inc.               | Baseline Data Acquisition and Numerical Modeling to Evaluate the Fate and Transport of PFAS within the Vadose Zone                                                                  |
| <a href="#">Brian Shedd</a>                          | USACE                                | Fate and Transport Mechanics for PFAS under Controlled Aquifer Conditions and Correlation to Existing Data                                                                          |
| <a href="#">Jennifer Guelfo</a>                      | Texas Tech Univ.                     | Development and Validation of Novel Techniques to Assess Leaching and Mobility of Per and Polyfluoroalkyl Substances (PFAS) in Impacted Media                                       |
| <a href="#">Paul Traneyek</a>                        | Oregon Health and Science Univ.      | In Silico Prediction of Fate and Risk-Determining Properties of Per- and Polyfluoroalkyl Substances (PFAS)                                                                          |
| <a href="#">Charles Schaefer</a>                     | CDM Smith                            | PFAS Leaching at AFFF-Impacted Sites: Insight into Soil-to-Groundwater Ratios                                                                                                       |

Supplemental Table 1. Completed and On-Going AFFF-Derived PFAS Projects with SERDP&ESTCP through May 2020

| Principal Investigator                 | Institution                    | Project Title                                                                                                                                              |
|----------------------------------------|--------------------------------|------------------------------------------------------------------------------------------------------------------------------------------------------------|
| <b>Groundwater Remediation Methods</b> |                                |                                                                                                                                                            |
| <a href="#">Chris Higgins</a>          | Colorado School Mines          | Behavior of Perfluoroalkyl Chemicals in Contaminated Groundwater                                                                                           |
| <a href="#">Qingguo Huang</a>          | Univ. Georgia                  | Remediation of Perfluoroalkyl Contaminated Aquifers using an In Situ Two-Layer Barrier                                                                     |
| <a href="#">Jennifer Field</a>         | Oregon State Univ.             | Characterization of the Fate and Biotransformation of Fluorochemicals in AFFF-Contaminated Groundwater at DOD Sites                                        |
| <a href="#">Shaily Mahendra</a>        | UC Los Angeles                 | Bioaugmentation with Vaults: Novel In Situ Remediation Strategy for Transformation of Perfluoroalkyl Compounds                                             |
| <a href="#">Michelle Crimi</a>         | Clarkson Univ.                 | In Situ Chemical Oxidation of Sorbed Contaminants for Remediation of PFAS-Contaminated Groundwater:                                                        |
| <a href="#">Charles Schaefer</a>       | CDM Smith                      | Investigating Electrocatalytic and Catalytic Approaches for in situ Treatment of PFAS Contaminants in Groundwater                                          |
| <a href="#">Matt Simcik</a>            | Univ. Minnesota                | Coagulant-enhanced Sorption for In Situ Remediation of PFAS Contaminated Groundwater Systems                                                               |
| <a href="#">Linda Lee</a>              | Purdue Univ.                   | Quantification of In Situ Chemical Reductive Defluorination of Perfluoroalkyl Acids in Ground Water Impacted by AFFFs                                      |
| <a href="#">John Kornuc</a>            | US NAVFEC                      | Field Demonstration to Enhance PFAS Degradation and Mass Removal Using Thermally-Enhanced Persulfate Oxidation                                             |
| <a href="#">Nathan Hagelin</a>         | Amec Foster Wheeler            | Removal and Destruction of PFAS and Co-contaminants from Groundwater                                                                                       |
| <a href="#">Kenan Ozekin</a>           | WERF                           | Evaluation and Life Cycle Comparison of Ex-Situ Treatment Technologies for PFAS in Groundwater                                                             |
| <a href="#">David Reynolds</a>         | Geosyntec                      | In-Situ Treatment of PFAS Using D-FAS Technology                                                                                                           |
| <a href="#">Joseph Quinnan</a>         | Arcadis-US Inc                 | PFAS Groundwater Treatment using Sub-Micron Powdered Activated Carbon and Ceramic Membrane Filter System                                                   |
| <a href="#">Kurt Pennell</a>           | Brown Univ.                    | Coupled Physicochemical and Biological Systems for In Situ Remediation of PFAS and Chlorinated Solvent Groundwater Plumes                                  |
| <a href="#">Lisa Alvarez-Cohen</a>     | UC Berkeley                    | In situ Remediation of AFFF and Common Co-Contaminants with Chemical Oxidation and Bioremediation                                                          |
| <a href="#">Qingguo Huang</a>          | Univ. Georgia                  | A Novel Reactive Electrochemical Membrane System for Treatment of Mixed Contaminants                                                                       |
| <a href="#">Jens Blotevogel</a>        | Colorado State Univ.           | Synergistic Treatment of Mixed 1,4-Dioxane and PFAS Contaminations by Combining Electrolytic Degradation with Electrobiostimulation                        |
| <a href="#">Chris Higgins</a>          | Colorado School Mines          | Fate and Transport Processes Impacting the Mass Discharge, Attenuation, and Treatment of PFAS and Co-mingled Chlorinated Solvents or Aromatic Hydrocarbons |
| <a href="#">Damian Helbling</a>        | Cornell Univ.                  | Rational Design and Implementation of Novel Polymer Adsorbents for Selective Uptake of PFAS from Groundwater                                               |
| <a href="#">Mark Fuller</a>            | Aptim                          | Ex Situ Treatment of PFAS Contaminated Groundwater Using Ion Exchange with Regeneration                                                                    |
| <a href="#">Reyes Sierra-Alvarez</a>   | Univ. Arizona                  | Remediation of PFAS Contaminated Groundwater Using Cationic Hydrophobic Polymers as Ultra-High Affinity Sorbents                                           |
| <a href="#">Timothy Strathmann</a>     | Colorado School Mines          | Regenerable Resin Sorbent Technologies with Regenerant Solution Recycling for Sustainable Treatment of PFAS                                                |
| <a href="#">Jing Zhou/Dora Chiang</a>  | CDM Smith                      | An Electrocoagulation and Electrooxidation Treatment Train to Degrade PFAS and Other Persistent Organic Contaminants in Groundwater                        |
| <a href="#">Jinyong Liu</a>            | UC Riverside                   | Treatment of Legacy and Emerging Fluoroalkyl Contaminants in Groundwater: Rapid and Regenerable Adsorption and UV-Induced Defluorination                   |
| <a href="#">Paul Edmiston</a>          | College of Wooster             | Removal of Complex Mixtures of Perfluoroalkyl Acids from Water Using Molecularly Engineered Coatings on Sand and Silica                                    |
| <a href="#">Michelle Crimi</a>         | Clarkson Univ.                 | Combined In Situ/Ex Situ Treatment Train for Remediation of PFAS Contaminated Groundwater                                                                  |
| <a href="#">Qingguo Huang</a>          | Univ. Georgia                  | Electrochemical Oxidation of Perfluoroalkyl Acids in Still Bottoms from Regeneration of Ion Exchange Resins                                                |
| <a href="#">Douglas Call</a>           | Research Triangle              | Electrically Assisted Sorption and Desorption of PFAS                                                                                                      |
| <a href="#">Mandy Michalsen</a>        | USACE                          | Molecular Design of Effective and Versatile Adsorbents for Ex Situ Treatment of AFFF-Impacted Groundwater                                                  |
| <a href="#">Rula Deeb</a>              | Geosyntec                      | Lines of Evidence to Assess the Effectiveness of PFAS Remedial Technologies                                                                                |
| <a href="#">Dick Luthy</a>             | Stanford Univ.                 | Prevention of Sediment Recontamination by Improved BMPs to Remove Organic and Metal Contaminants from Stormwater Runoff                                    |
| <a href="#">Staci Simonich</a>         | Oregon State Univ.             | Development, Evaluation, and Technology Transfer of BMPs for Optimizing Removal of PAHs, PCBs, PFAS, and Metals from Stormwater at DoD Sites               |
| <a href="#">Danny Reible</a>           | Texas Tech Univ.               | Development of Tools to Inform the Selection of Stormwater Controls at DoD Bases to Limit Potential Sediment Recontamination                               |
| <a href="#">Jinxia Liu</a>             | McGill Univ.                   | Microbially-mediated defluorination of high-priority per- and polyfluoroalkyl substances: Microorganisms, genetics, and biochemistry                       |
| <a href="#">Peter Jaffe</a>            | Princeton Univ.                | Biotransformation and Potential Mineralization of PFOS, PFHxS, and PFOA by Acidimicrobiaceae sp. A6 under Iron Reducing Conditions                         |
| <a href="#">Yujie Men</a>              | Univ. of California, Riverside | Identification, Characterization, and Application of Reductive Defluorinating Microorganisms                                                               |
| <a href="#">Bruce Rittmann</a>         | Arizona State Univ.            | A Synergistic Platform for Defluorination of Perfluoroalkyl Acids (PFAAs) through Catalytic Reduction Followed by Microbial Oxidation                      |
| <a href="#">Pedro Alvarez</a>          | Rice Univ.                     | Biodegradation of Per- and Polyfluoroalkyl Substances (PFASs) via Superoxide-Hyper-Producing Bacteria                                                      |
| <a href="#">Matt Simcik</a>            | University of Minnesota        | In Situ PFAS Sequestration in AFFF Contaminated Groundwater                                                                                                |
| <a href="#">Paul Hatzinger</a>         | Aptim Federal Services, LLC    | Validation of colloidal activated carbon for preventing the migration of PFAS in groundwater                                                               |
| <a href="#">Dave Lippincott</a>        | Aptim Federal Services, LLC    | Anion Exchange Permeable Adsorptive Barriers (PABs) for In Situ PFAS Immobilization and Removal                                                            |
| <a href="#">Joseph Quinnan</a>         | Arcadis-US Inc                 | Ex situ Soil Washing to Remove PFAS Adsorbed to Soils from Source Zones                                                                                    |

**Supplemental Table 1. Completed and On-Going AFFF-Derived PFAS Projects with SERDP&ESTCP through May 2020**

| Principal Investigator                | Institution                        | Project Title                                                                                                                                                     |
|---------------------------------------|------------------------------------|-------------------------------------------------------------------------------------------------------------------------------------------------------------------|
| <b>Treatment of PFAS Residuals</b>    |                                    |                                                                                                                                                                   |
| <a href="#">Hyeok Choi</a>            | Univ. Texas Arlington              | Chemical Decomposition Combined with Physical Adsorption for the Treatment of Investigation-Derived Waste Containing PFAS                                         |
| <a href="#">Brian Chaplin</a>         | Univ. Illinois Chicago             | Reactive Electrochemical Membrane Reactors for the Oxidation of Perfluoroalkyl Compound Contaminated Water                                                        |
| <a href="#">Jinyong Liu</a>           | UC Riverside                       | High-Performance Treatment of PFAS from Investigation-derived Waste: Integrating Advanced Oxidation-Reduction and Membrane Concentration                          |
| <a href="#">Timothy Strathmann</a>    | Colorado School Mines              | Hydrothermal Technologies for On-Site Destruction of Site Investigation Wastes Contaminated with PFAS                                                             |
| <a href="#">Zach Hendren</a>          | Research Triangle                  | Effective Destruction of PFAS in Water by Modified SiC-Based Photocatalysts                                                                                       |
| <a href="#">Don Zhao</a>              | Auburn Univ.                       | A Cost-Effective Technology for Destruction of PFAS from DoD Subsurface Investigation-Derived Wastes                                                              |
| <a href="#">Hailiang Dong</a>         | Miami Univ.                        | Complete Reductive Defluorination of PFAS by Hydrated Electrons Generated from 3-Indole-acetic-acid in Chitosan-Modified Montmorillonite                          |
| <a href="#">Thomas Boving</a>         | Univ. Rhode Island                 | Innovative Treatment of Investigation-Derived Waste Polluted with PFAS and Other Co-Contaminants                                                                  |
| <a href="#">Paul Koster van Groos</a> | Aptim                              | Small-Scale Thermal Treatment of Investigation-Derived Wastes Containing PFAS                                                                                     |
| <a href="#">Christopher Sales</a>     | Drexel Univ.                       | Application of Non-Thermal Plasma Technology for the Removal of PFAS from Investigation-Derived Wastes                                                            |
| <a href="#">Frank Barranco</a>        | EA Engineering                     | Evaluation of Indirect Thermal Desorption Coupled with Thermal Oxidation Technology to Treat Solid PFAS-impacted Investigation-Derived Waste                      |
| <a href="#">Dave Major</a>            | Geosyntec                          | Demonstration of Smoldering Combustion Treatment of PFAS-impacted Investigation-Derived Waste                                                                     |
| <a href="#">David Jassby</a>          | UC Los Angeles                     | A Combined Photo/Electrochemical Reductive Pathway Towards Enhanced PFAS Degradation                                                                              |
| <a href="#">Ezra Cates</a>            | Clemson Univ.                      | Pilot Scale Assessment of a Deployable Photocatalytic Treatment System Modified with BiPO4 Catalyst Particles for PFAS Destruction in Investigation-Derived Waste |
| <a href="#">James Hatton</a>          | Jacobs Engineering                 | Field Demonstration of Infrared Thermal Treatment of PFAS-contaminated Soils from Subsurface Investigations                                                       |
| <a href="#">Suresh Pillai</a>         | Texas A&M Univ.                    | Ex Situ Remediation of Investigation-Derived Wastes containing PFAS by Electron Beam Technology                                                                   |
| <a href="#">Thomas Holsen</a>         | Clarkson Univ.                     | Plasma Based Treatment Processes for PFAS Investigation Derived Waste                                                                                             |
| <a href="#">Lisa Yu</a>               | Amriton LLC                        | Destruction of PFAS and Organic Co-Contaminants in Water and Soil Present in Investigation-Derived Waste at DoD Sites using Novel Adsorbent and Ultrasound        |
| <a href="#">Jennifer Wehrmann</a>     | Paragon Professional Services, LLC | Ex Situ Thermal Treatment of Perfluoroalkyl and Polyfluoroalkyl Substances                                                                                        |
| <a href="#">Ramona Iery</a>           | U.S. Navy Facilities Engineering   | In Situ Thermal Treatment of PFAS in the Vadose Zone                                                                                                              |
| <a href="#">Marc Deshusses</a>        | Duke Univ.                         | Supercritical Water Oxidation (SCWO) for Complete PFAS Destruction                                                                                                |
| <a href="#">Selma Mededovic</a>       | DMAX Plasma LLC                    | An Innovative Plasma Technology for Treatment of AFFF Rinsate from Firefighting Delivery Systems                                                                  |
| <a href="#">Matthew Magnuson</a>      | U.S. EPA                           | Clean or Replace? Decontamination framework for firefighting equipment and hangers and disposal of PFAS contaminated waste                                        |
| <a href="#">Ian Ross</a>              | Arcadis-US Inc                     | Demonstration and Validation of Environmentally Sustainable Methods to Effectively Remove PFASs from Fire Suppression Systems                                     |
| <a href="#">Chris Bellona</a>         | Colorado School of Mines           | Remediation of AFFF-Impacted Fire Suppression Systems Using Nanofiltration and Electrochemical Treatment                                                          |
| <a href="#">Kent Sorenson</a>         | CDM Smith                          | Sustainable Firefighting System Cleanout and Rinsate Treatment Using PerfluorAd Coupled with Electrochemical Destruction                                          |
| <b>Development of PFAS-Free AFFF</b>  |                                    |                                                                                                                                                                   |
| <a href="#">Satya Chauhan</a>         | Battelle                           | Validation of PFAS-free AFFF against Military Specification Performance Criteria                                                                                  |
| <a href="#">Jerry Back</a>            | Jensen Hughes, Inc.                | Capabilities Assessment of Commercially Available PFAS-Free Foams                                                                                                 |
| <a href="#">Brian Lattimer</a>        | Jensen Hughes, Inc.                | Screening Tests for PFAS-Free Firefighting Foams                                                                                                                  |
| <a href="#">Hans Ewoldsen</a>         | Nu Element, Inc.                   | A PFAS-free, 100% Bio-based Fire-fighting Material                                                                                                                |
| <a href="#">Joseph Tsang</a>          | USN Air Warfare Cntr.              | Novel PFAS-Free Replacement For Aqueous Film Forming Foam                                                                                                         |
| <a href="#">John Payne</a>            | National Foam                      | PFAS-Free Aqueous Film Forming Foam                                                                                                                               |
| <a href="#">Ramagopal Ananth</a>      | U.S. Naval Research Lab            | PFAS-free Foams with Oleophobic Surfactants and Additives for Effective Pool Fire Suppression                                                                     |
| <a href="#">Matthew Davis</a>         | NAWCWD China Lake                  | Surfactants with Organosilicate Nanostructures for Use as Fire-Fighting Foams (F3)                                                                                |
| <a href="#">Ramagopal Ananth</a>      | U.S. Naval Research Lab            | Stability of PFAS-free Foams with Siloxane Surfactants for Improved Pool Fire Suppression                                                                         |
| <a href="#">Jaspreet Dhau</a>         | Molekule Inc                       | Innovative Nano-Encapsulated Ionic Liquid-based Surfactants for PFAS-free Fire Extinguishing Foams                                                                |
| <a href="#">Kris Rangan</a>           | Materials Modification             | PFAS free aqueous film forming foams based on functional siloxanes                                                                                                |
| Jeffery Owens                         | Air Force Civil Engineer Center    | Enhancement of PFAS-free Fire Fighting Agents for Compressed Air Foam Applications                                                                                |
| Braden Giordano                       | US Naval Research Laboratory       | Polyethylene Oxide-based Polymer Formulations for PFAS Free Fire Suppression                                                                                      |
| Kris Rangan                           | Materials Modification             | Additive Enhanced Siloxane Surfactants for Fire Fighting Foams                                                                                                    |
| Jaspreet Dhau                         | Molekule Inc                       | Innovative Nano-Encapsulated Ionic Liquid-Based Surfactants for PFAS-Free Fire Extinguishing Foams                                                                |
| Tirumalai Sudarshan                   | Materials Modification             | Aqueous Film Forming Foams based on Biodegradable Natural Surfactants and Additives                                                                               |
| Kris Rangan                           | Materials Modification             | Hollow Microspheres based Fire Fighting Foams                                                                                                                     |
| Robert Kasowski                       | P N Solutions Inc.                 | Extinguishing Class B Fires with PNS, an Environmentally-Friendly Compound                                                                                        |
| Satya Chauhan                         | Battelle Memorial Institute        | Validation of PFAS-Free Fire Suppression Alternatives (FF_FSA) against Military Specifications                                                                    |
| David Munroe                          | ACAF Systems                       | PFAS-Free Foam / Compressed Air Foam, Fire Suppression Alternative                                                                                                |
| Thierry Carriere                      | ADA Technologies, Inc.             | Testing of New PFAS-Free Green Surfactant Mixtures to Replace AFFF                                                                                                |
| Ameek Polk                            | CCDC Chemical Biological Center    | Demonstration and Validation of PFAS Free Fire Suppression Alternatives                                                                                           |
